# Supplementary material for: The characteristics and operations of “online pharmacies” investigated in relation to medicines popularised during the coronavirus pandemic: a cross-sectional study
Source: Front Pharmacol. 2024 Feb 20;15:1346604. doi: 10.3389/fphar.2024.1346604 (PMC10912318; doi:10.3389/fphar.2024.1346604)
Supplement: Supplementary file 1 [file Table2.XLSX]

## Sheet: Sheet1
	Identification of the operator							Medicines sold (Range of medicines provided to the public)			Prescription requirement	Information exchange				Payment and delivery				User friendliness and appearance (subjective elements)			Legitimacy verification
#	Name of Online Organisation	Domain Name - URL	Year website was published	Location of operation	Telephone contact	Location of server according to IP address	Does location match IP address?	Variety of drugs sold	Classification of drugs sold	Number of selected drugs openly advertised and able to be acquired from webpage	Requirement of prior medical prescriptions for POMs	Availability of online consultation	Requirement of patient's medical information	Availability of general product information	Availability of PIL online	Available payment methods	Delivery time (Working days)	Cost of delivery	Refund policy for medication	User friendly navigation	General appearance and design	Customer feedback on website	Legitmacy according to GPhC and MHRA database	Approved by other regulatory bodies (if not regulated by GPhC/MHRA)
1	1 Click RX Shop	https://canadapharmacy-usa.com/catalog.php	2021	N/A	US: +1-718-475-90-88; UK: +442030110241	Netherlands - Europe	N/A	Generic	POM	13 (Paracetamol, Dapagliflozin, Metformin, Rosuvastatin, Ezetimibe, Formoterol, Hydroxychloroquine, Ivermectin, Chloroquine, Fluoxetine, Aspirin, Diclofenac, Azithromycin)	No	No	No	Detailed	Not Available	3 (Visa, Mastercard, Bitcoin)	5-21 days	Free - $30	Refund guaranteed	Average	Average	Displayed	Illegitimate	Unapproved
2	Access Doctor	https://accessdoctor.co.uk/	2021	UK	020 7538 4139	UK - Europe	Yes	Both	GSL, P and POM	5 (Paracetamol, Rosuvastatin, Formoterol, Diclofenac, Azithromycin)	No	Yes	Yes	Detailed	Detailed	2 (Visa, Mastercard)	1-4 days	Free - £3.99	No refund (Unless faulty, damaged or incorrect)	Easy to use	Excellent	Displayed	Legitimate - GPhC	N/A
3	AdooQ	https://www.adooq.com/	2019	USA	(866) 930-6790	USA - North America	Yes	Generic	GSL, P, POM and Veternairy	12 (Paracetamol, Dapagliflozin, Metformin, Rosuvastatin, Ezetimibe, Formoterol, Hydrochloroquine, Ivermectin, Chloroquine, Aspirin, Diclofenac, Azithromycin)	No	No	No	Incomplete	Not Available	4 (Visa, Mastercard, American Express, Discover)	2-3 days	Free - $40	Refund guaranteed	Easy to use	Excellent	Not Available	Illegitimate	Unapproved
4	Amcal+	https://www.amcal.com.au/	2021	Australia	1300 790 618	Australia - Oceania	Yes	Both	GSL and P	2 (Paracetamol, Aspirin)	N/A	No	No	Incomplete	Not Available	3 (Visa, Mastercard, PayPal)	2-7 days	Free - $7.50	No refund (Unless faulty, damaged or incorrect)	Easy to use	Excellent	Not Available	Illegitimate	LegitScript - Approved
5	Anytime Doctor	https://www.anytimedoctor.co.uk/	2021	UK	0845 366 8524	UK - Europe	Yes	Both	POM	3 (Metformin, Formoterol, Azithromycin)	No	Yes	Yes	Detailed	Detailed	4 (Visa, Mastercard, American Express, Apple Pay)	1-3 days	Free	No refund (Unless faulty, damaged or incorrect)	Average	Excellent	Displayed	Legitimate - GPhC	N/A
6	AYP Healthcare	https://ayp.healthcare/	2021	UK	0800 048 7211	UK - Europe	Yes	Both	GSL, P and POM	3 (Paracetamol, Aspirin, Diclofenac)	No	Yes	Yes	Detailed	Not Available	4 (Visa, Mastercard, American Express, Apple Pay)	2-5 days	Free - £2.49	No refund (Unless faulty, damaged or incorrect)	Easy to use	Excellent	Displayed	Legitimate - GPhC	N/A
7	Best Pain Shop	https://www.bestpainshop.com/	2020	USA	+01 2121 313	Canada - North America	No	Both	POM	2 (Alprazolam, Diazepam)	No	No	No	Detailed	Not Available	2 (Paypal, Western Union)	3-7 days	Free - $10	Refund guaranteed	Average	Average	Not Available	Illegitimate	Unapproved
8	Best Sleeping Tablets	https://www.bestsleepingtablets.com/	2021	N/A	N/A	Singapore - Asia	N/A	Both	P and POM	3 (Paracetamol, Alprazolam, Diazepam)	No	No	No	Detailed	Detailed	4 (Visa, Mastercard, Bank Transfer, Bitcoin)	2-5 days	Free - £7.50	No refund (Unless faulty, damaged or incorrect)	Easy to use	Excellent	Displayed	Illegitimate	Unapproved
9	Big Pharmas Shop	https://bigpharmasshop.com/	2021	N/A	+1 (323) 380 4083	USA - North America	N/A	Both	POM	2 (Alprazolam, Diazepam)	No	No	No	Detailed	Not Available	3 (Bitcoin, Zellepay, Moneygram)	Next day - 10 days	Free - $60	N/A	Average	Average	Displayed	Illegitimate	Unapproved
10	BinSina	https://www.binsina.ae/en/	2020	UAE	8002467462	India - Asia	No	Branded	GSL and P	3 (Paracetamol, Aspirin, Diclofenac)	N/A	No	No	Incomplete	Not Available	All major bank cards online and cash on delivery	1-2 days	Free	No refund (Unless faulty, damaged or incorrect)	Easy to use	Average	Not Available	Illegitimate	Unapproved
11	Blink Health	https://www.blinkhealth.com/	2021	USA	1 (844) 265-6444	USA - North America	Yes	Generic	POM	15 (Paracetamol, Dapagliflozin, Metformin, Rosuvastatin, Ezetimibe, Formoterol, Hydroxychloroquine, Ivermectin, Chloroquine, Fluoxetine, Alprazolam, Aspirin, Diclofenac, Azithromycin, Diazepam)	Yes	No	No	Not Available	Not Available	5+ (Visa,Mastercard, Amex, FSA and HSA cards + more)	1-10 days	Free	No refund (Unless faulty, damaged or incorrect)	Easy to use	Excellent	Not Available	Illegitimate	LegitScript & NABP - Approved
12	Cadstore RX	https://cadstorerx.com/	2020	Switzerland	+ 131 294 07051	USA - North America	No	Both	P and POM	12 (Paracetamol, Metformin, Rosuvastatin, Ezetimibe, Formoterol, Hydroxychloroquine, Ivermectin, Chloroquine, Fluoxetine, Aspirin, Diclofenac, Azithromycin)	No	No	No	Detailed	Not Available	4 (Visa, Mastercard, Western Union, MoneyGram)	10-23 days	Free - $25	Refund guaranteed	Average	Average	Not Available	Illegitimate	Unapproved
13	Canada Drugs	http://alternativerxhealth.net/	N/A	Czech Republic	US: +18007155341, EU: +442033185981	USA - North America	No	Both	POM	9 (Rosuvastatin, Ezetimibe, Hydroxychloroquine, Ivermectin, Chloroquine, Fluoxetine, Aspirin, Diclofenac, Azithromycin)	No	No	No	Detailed	Not Available	4 (Visa Mastercard, Bitcoin, PayPal)	5 days - 4 weeks	£11.13 - £18.58	Refund guaranteed	Easy to use	Average	Not Available	Illegitimate	Unapproved
14	Canada Pharmacy Online	https://www.canadapharmacyonline.com/	2021	Canada	1-866-920-3784	USA - North America	No	Both	GSL, P, POM and Veternairy	12 (Dapagliflozin, Metformin, Rosuvastatin, Ezetimibe, Formoterol, Hydroxychloroquine, Ivermectin, Chloroquine, Fluoxetine, Aspirin, Diclofenac, Azithromycin)	No	Yes	Yes	Detailed	Not Available	3 (Check, ACH, International Money Order)	8-18 days	10	No refund (Unless faulty, damaged or incorrect)	Easy to use	Average	Displayed	Illegitimate	CIPA & IPABC Approved
15	Canadian Drug Store	https://healthworldcp.com/	2017	N/A	US: +1 (888) 243-74-06; UK: +44 (800) 041-87-44	USA - North America	N/A	Both	P and POM	9 (Dapagliflozin, Metformin, Rosuvastatin, Ezetimibe, Ivermectin, Fluoxetine, Aspirin, Diclofenac, Azithromycin)	No	No	No	Detailed	Not Available	4 (Visa, Mastercard, American Express, Diners Club)	7-21 days	Free - $29.95	No refund (Unless faulty, damaged or incorrect)	Average	Average	Displayed	Illegitimate	Unapproved
16	Canadian Pharmacy	https://myhealthmedcare.com/	2021	Canada	+1(864) 610-3116	USA - North America	No	Both	POM	13 (Paracetamol, Dapagliflozin, Metformin, Rosuvastatin, Ezetimibe, Formoterol, Hydroxychloroquine, Ivermectin, Chloroquine, Fluoxetine, Aspirin, Diclofenac, Azithromycin)	No	No	No	Detailed	Not Available	3 (Mastercard, Echeck, Bitcoin, PayPal)	1 week - 4 weeks	Free - £22.16	Refund guaranteed	Easy to use	Average	Displayed	Illegitimate	Unapproved
17	Canadian Pharmacy	http://ca-pharm.net/	2021	N/A	+17184879792, +442032397092	Lithuania - Europe	N/A	Both	POM	12 (Dapagliflozin, Metformin, Rosuvastatin, Ezetimibe, Formoterol, Hydroxychloroquine, Ivermectin, Chloroquine, Fluoxetine, Aspirin, Diclofenac, Azithromycin)	No	No	No	Detailed	Not Available	1 (Mastercard)	3 days - 3 weeks	Free - $29.95	No refund (Unless faulty, damaged or incorrect)	Average	Average	Displayed	Illegitimate	Unapproved
18	Canadian Pharmacy	http://world-medic-store.com/	2021	N/A	+17184879792, +442032397092	Lithuania - Europe	N/A	Both	POM	12 (Dapagliflozin, Metformin, Rosuvastatin, Ezetimibe, Hydroxychloroquine, Ivermectin, Chloroquine, Fluoxetine, Aspirin, Diclofenac, Azithromycin, Diazepam)	No	No	No	Detailed	Not Available	7 (Visa, Mastercard, American Express, PayPal, Bitcoin .....)	3 days - 3 weeks	$9.95 - $29.95	No refund (Unless faulty, damaged or incorrect)	Average	Average	Displayed	Illegitimate	Unapproved
19	Canadian Pharmacy World	https://www.canadianpharmacyworld.com/	2021	Canada	1-866-485-7979	USA - North America	No	Both	P and POM	12 (Dapagliflozin, Metformin, Rosuvastatin, Ezetimibe, Formoterol, Hydroxychloroquine, Ivermectin, Chloroquine, Fluoxetine, Aspirin, Diclofenac, Azithromycin)	Yes	No	No	Detailed	Not Available	3 (Check, ACH, International Money Order)	16-20 days	Free	No refund (Unless faulty, damaged or incorrect)	Average	Average	Displayed	Illegitimate	CIPA & IPABC Approved
20	Chemist Click	https://www.chemistclick.co.uk/	2021	UK	1923549040	USA - North America	No	Both	GSL, P and POM	1 (Azithromycin)	No	Yes	Yes	Detailed	Detailed	4 (Visa, Mastercard, American Express, Maestro)	1-5 days	Free - £15.99	No refund (Unless faulty, damaged or incorrect)	Easy to use	Excellent	Displayed	Legitimate - GPhC	N/A
21	Chemist Direct	https://www.chemistdirect.co.uk/	2021	UK	0121 541 1800	UK - Europe	Yes	Both	GSL and P	3 (Paracetamol, Aspirin, Diclofenac)	N/A	Yes	Yes	Detailed	Not Available	5 (Visa, Mastercard, American Express, JCB, PayPal)	Same day - 20 days	Free - £4.99 (additional charge of £3.49 per 25kg when over £25)	No refund (Unless faulty, damaged or incorrect)	Easy to use	Average	Displayed	Legitimate - GPhC	N/A
22	Chemist Warehouse	https://www.chemistwarehouse.com.au/	2021	Australia	1300 367 283	Australia - Oceania	Yes	Both	GSL, P and POM	14 (Paracetamol, Dapagliflozin, Metformin, Rosuvastatin, Ezetimibe, Formoterol, Hydroxychloroquine, Ivermectin, Fluoxetine, Alprazolam, Aspirin, Diclofenac, Azithromycin, Diazepam)	Yes	Yes	Yes	Detailed	Not Available	14 (Visa, Mastercard, PayPal, American Express, Union Pay, Slyp....)	1-14 days	Free - $34.13	No refund (Unless faulty, damaged or incorrect)	Easy to use	Average	Displayed	Illegitimate	Unapproved
23	Chemist-4-u	https://www.chemist-4-u.com/	2021	UK	+44 01695474433	USA - North America	No	Both	GSL, P and POM	4 (Paracetamol, Chloroquine, Aspirin, Diclofenac)	No	Yes	Yes	Detailed	Detailed	4 (Visa, Mastercard, American Express, Apple Pay)	1-5 days	Free - £8.95	No refund (Unless faulty, damaged or incorrect)	Easy to use	Excellent	Displayed	Legitimate - GPhC	N/A
24	CloudPharmacy	https://www.cloudpharmacy.co.uk/	2021	UK	020 7157 9759	USA - North America	No	Both	GSL, P and POM	3 (Paracetamol, Diclofenac, Azithromycin)	No	Yes	Yes	Detailed	Detailed	2 (Visa, Mastercard)	1-5 days	Free - £7.99	No refund (Unless faulty, damaged or incorrect)	Easy to use	Excellent	Not Available	Legitimate - GPhC	N/A
25	Confidential Clinics	https://www.confidentialclinics.com/	2021	UK	0208 748 6330	Ireland - Europe	No	Both	POM	None	No	No	No	Detailed	Not Available	2 (Visa, Mastercard)	1-5 days	£4 - £6	Refund guaranteed	Easy to use	Excellent	Displayed	Legitimate - GPhC	N/A
26	Daily Chemist	https://www.dailychemist.com/	2021	UK	020 3318 3083	USA - North America	No	Both	GSL, P and POM	4 (Paracetamol, Chloroquine, Aspirin, Diclofenac)	No	Yes	Yes	Detailed	Detailed	5 (Visa, PayPal, Stripe, Mastercard,American Express)	1-5 days (Can get same day evening delivery if order before 12.30pm)	Free - £29.99	No refund (Unless faulty, damaged or incorrect)	Easy to use	Excellent	Displayed	Legitimate - GPhC	N/A
27	Diazepam UK	https://www.diazepamuk.com/	2021	UK	N/A	Germany - Europe	No	Both	POM	2 (Alprazolam, Diazepam)	No	No	No	Detailed	Not Available	4 (Visa, Mastercard, Bank Transfer, Bitcoin)	2-7 days	Free - £7.50	No refund (Unless faulty, damaged or incorrect)	Easy to use	Excellent	Displayed	Illegitimate	Unapproved
28	Diazepam Vendor	https://diazepamvendor.com/	2021	USA	+1 914 505-8666	USA - North America	Yes	Both	POM	3 (Paracetamol, Alprazolam, Diazepam)	No	No	No	Incomplete	Not Available	4 (Google Pay, Bitcoin, Cash On Delivery, DK Payment)	Next day - 8 days	Free - $60	Refund guaranteed	Average	Average	Not Available	Illegitimate	Unapproved
29	Direct2Chemist	https://direct2chemist.net/	2020	UK	01282 786300	UK - Europe	Yes	Both	GSL	None	N/A	No	No	Detailed	Not Available	4 (Visa, Maestro, PayPal, Discover)	N/A	Free	Refund guaranteed	Average	Average	Displayed	Legitimate - GPhC	N/A
30	DOC (Doctor On Call)	https://www.doctoroncall.com.my/	2021	Malaysia	60384082000	Singapore - Asia	No	Branded	GSL, P and POM	10 (Paracetamol, Dapagliflozin, Metformin, Rosuvastatin, Ezetimibe, Formoterol, Hydroxychloroquine, Aspirin, Diclofenac, Azithromycin)	Yes	Yes	Yes	Detailed	Not Available	7 (Visa, Mastercard, American Express, Boost,GrabPay ....)	Same day - 3 days	Free	No refund (Unless faulty, damaged or incorrect)	Easy to use	Excellent	Displayed	Illegitimate	Unapproved
31	Dock Pharmacy	https://www.dockpharmacy.com/	2018	UK	01375 846 316	USA - North America	No	Both	GSL, P and POM	11 (Paracetamol, Metformin, Rosuvastatin, Formoterol, Hydroxychloroquine, Ivermectin, Chloroquine, Fluoxetine, Aspirin, Diclofenac, Azithromycin)	Yes	Yes	Yes	Detailed	Detailed	6 (Visa, Mastercard, American Express, Bank Transfer, Maestro, PayPal)	2-15 days	Free - £55.09	No refund (Unless faulty, damaged or incorrect)	Easy to use	Poor	Displayed	Legitimate - GPhC	N/A
32	Dokter Online	https://www.dokteronline.com/en/	2021	Netherlands	00800-486-72968	USA - North America	No	Both	P and POM	8 (Metformin, Rosuvastatin, Ezetimibe, Formoterol, Hydroxychloroquine, Chloroquine, Diclofenac, Azithromycin)	No	Yes	Yes	Detailed	Detailed	12 (Visa, Mastercard, Klarna, Bank Transfer, Paypal .....)	1-3 days	Free	Refund guaranteed	Easy to use	Excellent	Displayed	Illegitimate	Dutch Ministry of Health, Welfare and Sport - Approved
33	Dr Felix	https://www.drfelix.co.uk/	2021	UK	01236 758420	UK - Europe	Yes	Both	GSL, P and POM	8 (Paracetamol, Metformin, Rosuvastatin, Formoterol, Ivermectin, Chloroquine, Diclofenac, Azithromycin)	No	Yes	Yes	Detailed	Detailed	3 (Visa, Mastercard, American Express)	1-5 days	£3.99 - £25	No refund (Unless faulty, damaged or incorrect)	Easy to use	Excellent	Displayed	Legitimate - GPhC	N/A
34	Dr Fox	https://www.doctorfox.co.uk/	2021	UK	0117 2050198	UK - Europe	Yes	Both	GSL, P and POM	2 (Ivermectin, Azithromycin)	No	Yes	Yes	Detailed	Detailed	2 (Visa, Mastercard)	1-5 days	£2.90	Refund guaranteed	Easy to use	Excellent	Displayed	Legitimate - GPhC	N/A
35	EU Meds	https://eumeds.com/	2021	UAE	01695 213 118	USA - North America	No	Both	POM	6 (Dapagliflozin, Metformin, Ezetimibe, Diclofenac, Azithromycin, Diazepam)	No	Yes	Yes	Detailed	Not Available	5 (Visa, Mastercard, American Express, Google Pay, Apple Pay)	3-4 days	£7.95	No refund (Unless faulty, damaged or incorrect)	Easy to use	Excellent	Displayed	Illegitimate	Unapproved
36	Euro Clinix	https://www.euroclinix.net/en/	2021	UK	020 3322 1755	USA - North America	No	Both	POM	5 (Metformin, Rosuvastatin, Formoterol, Chloroquine, Azithromycin)	No	Yes	Yes	Detailed	Detailed	15 (Visa, Mastercard, Klarna, American Express, Sofort, Trustly....)	1-15 days (Can nominated day for delivery)	Free - £19.99	No refund (Unless faulty, damaged or incorrect)	Easy to use	Excellent	Displayed	Legitimate - GPhC	N/A
37	EVO Pharmacy	https://evo-pharmacy.com/	2021	N/A	US: +18885237141, UK: +448081891420	USA - North America	N/A	Both	POM	11 (Paracetamol, Metformin, Rosuvastatin, Ezetimibe, Formoterol, Hydroxychloroquine, Ivermectin, Chloroquine, Fluoxetine, Diclofenac, Azithromycin)	No	No	No	Detailed	Not Available	7 (Visa, Mastercard, Bitcoin, American Express, JCB .....)	5-21 days	£22.31	Refund guaranteed	Average	Average	Displayed	Illegitimate	Unapproved
38	Express Pharmacy	https://www.expresspharmacy.co.uk/	2021	UK	0208 123 0703	Ireland - Europe	No	Both	GSL, P and POM	2 (Paracetamol, Azithromycin)	No	Yes	Yes	Detailed	Detailed	2 (Visa, Mastercard)	1-7 days	£3.00 - £20.00 (Free collection)	No refund (Unless faulty, damaged or incorrect)	Easy to use	Excellent	Displayed	Legitimate - GPhC	N/A
39	First Med	https://www.firstmedinc.com/	2021	Hong Kong	N/A	USA - North America	No	Branded	POM	1 (Ivermectin)	No	No	No	N/A	N/A	N/A	2-4 days	N/A	N/A	Average	Average	Displayed	Illegitimate	Unapproved
40	GNH India	https://www.gnhindia.com/	2021	USA	+91 226 270 6900	India - Asia	No	Both	GSL, P and POM	15 (Paracetamol, Dapagliflozin, Metformin, Rosuvastatin, Ezetimibe, Formoterol, Hydroxychloroquine, Ivermectin, Chloroquine, Fluoxetine, Alprazolam, Aspirin, Diclofenac, Azithromycin, Diazepam)	Yes	No	No	Not Available	Not Available	Preferably wire transfer	Can be more than 30 days	Varies, up for negotiation	No refund (Unless faulty, damaged or incorrect)	Average	Average	Not Available	Illegitimate	Unapproved
41	Happy Family Store	https://pharmrx-1.com/	2021	N/A	+44 (800) 041-87-44	France - Europe	N/A	Both	P and POM	10 (Dapagliflozin, Meformin, Rosuvastatin, Ezetimibe, Hydroxychloroquine, Ivermectin, Fluoxetine, Aspirin, Diclofenac, Azithromycin)	No	No	No	Detailed	Not Available	7 (Visa, Mastercard, PayPal, Bitcoin, American Express .....)	3 days - 3 weeks	Free - $29.95	No refund (Unless faulty, damaged or incorrect)	Average	Average	Displayed	Illegitimate	Unapproved
42	Happy Family Store	https://bestmedsmarket247.com/	2021	N/A	GB: +44 (800) 041-87-44, US: +1 (888) 243-74-06	France - Europe	N/A	Both	POM	10 (Dapagliflozin, Meformin, Rosuvastatin, Ezetimibe, Hydroxychloroquine, Ivermectin, Fluoxetine, Aspirin, Diclofenac, Azithromycin)	No	No	No	Detailed	Not Available	7 (Visa, Mastercard, American Express, PayPal, Bitcoin .....)	3 days - 3 weeks	Free - $29.95	No refund (Unless faulty, damaged or incorrect)	Easy to use	Excellent	Displayed	Illegitimate	Unapproved
43	Happy Family Store	https://pharmacitec.com/	2021	N/A	GB: +44 (800) 041-87-44, US: +1 (888) 243-74-06	Canada - North America	N/A	Both	POM	10 (Dapagliflozin, Meformin, Rosuvastatin, Ezetimibe, Hydroxychloroquine, Ivermectin, Fluoxetine, Aspirin, Diclofenac, Azithromycin)	No	No	No	Detailed	Not Available	2 (Visa, Mastercard)	3 days - 3 weeks	Free - $29.95	No refund (Unless faulty, damaged or incorrect)	Easy to use	Excellent	Displayed	Illegitimate	Unapproved
44	Health Express	https://www.healthexpress.co.uk/	2021	UK	0203 322 9966	USA - North America	No	Both	P and POM	5 (Dapagliflozin, Metfromin, Rosuvastatin, Formoterol, Azithromycin)	No	Yes	Yes	Detailed	Detailed	14 (Visa, Mastercard, Klarna, American Express, Sofort, Trustly....)	1-3 days (Can nominated day for delivery)	Free	No refund (Unless faulty, damaged or incorrect)	Easy to use	Excellent	Displayed	Legitimate - GPhC	N/A
45	Health Warehouse	https://www.healthwarehouse.com/	2021	USA	1-800-748-7001	USA - North America	Yes	Both	GSL, P and POM	12 (Metformin, Rosuvastatin, Ezetimibe, Hydroxychloroquine, Ivermectin, Chloroquine, Fluoxetine, Alprazolam, Aspirin, Diclofenac, Azithromycin, Diazepam)	Yes	Yes	Yes	Detailed	Not Available	5 (Visa, Mastercard, American Express, Discover, Bank Transfer)	1-8 days	Free - $35.99	No refund (Unless faulty, damaged or incorrect)	Easy to use	Average	Displayed	Illegitimate	LegitScript - Approved
46	Hims	https://www.forhims.com/	2021	N/A	N/A	USA - North America	N/A	Generic	GSL, P and POM	1 (Fluoxetine)	Yes	Yes	Yes	Detailed	N/A	N/A	Same day - 7 days	Free	No refund (Unless faulty, damaged or incorrect)	Easy to use	Excellent	Displayed	Illegitimate	LegitScript - Approved
47	Home Health UK	https://homehealth-uk.com/	2021	UK	0044(0)1923711511	UK - Europe	Yes	Both	GSL and P	2 (Paracetamol, Aspirin)	N/A	Yes	Yes	Detailed	Detailed	5 (Visa, Mastercard, PayPal, Delta, Switch)	1 day - 6 weeks	Free - £23.99	No refund (Unless faulty, damaged or incorrect)	Easy to use	Average	Displayed	Legitimate - GPhC	N/A
48	Hqpharmacyonline365.com	https://hqpharmacyonline365.com/	2021	N/A	+1 (888) 724-0478	USA - North America	N/A	Generic	P and POM	7 (Metformin, Chloroquine, Fluoxetine, Alprazolam, Aspirin, Azithromycin, Diazepam)	No	No	No	Detailed	Not Available	3 (Visa, Mastercard, Bitcoin)	3-60 days	£22.50 - £26.25	Refund guaranteed	Average	Average	Displayed	Illegitimate	Unapproved
49	Hyperdrug	https://www.hyperdrug.co.uk/	2021	UK	01833 641112	USA - North America	No	Both	GSL, P, POM and Veternairy	6 (Paracetamol, Metformin, Ivermectin, Fluoxetine, Aspirin, Diazepam)	Yes	Yes	Yes	Incomplete	Not Available	6 (Visa, Mastercard, American Express, Sage Pay, Maestro, PayPal)	1-5 days	£2.50 - Over £10	No refund (Unless faulty, damaged or incorrect)	Easy to use	Excellent	Displayed	Legitimate - GPhC	N/A
50	Indiamart	https://www.indiamart.com/	2021	India	+91 – 120 – 6777777	USA - North America	No	Both	GSL, P, POM and Veternairy	15 (Paracetamol, Dapagliflozin, Metformin, Rosuvastatin, Ezetimibe, Formoterol, Hydroxychloroquine, Ivermectin, Chloroquine, Fluoxetine, Alprazolam, Aspirin, Diclofenac, Azithromycin, Diazepam)	No	No	No	Not Available	Not Available	6 (Visa, Mastercard, Net Banking, Lipi, EMI, RuPay)	N/A	N/A	N/A	Average	Average	Not Available	Illegitimate	Unapproved
51	Internationaldrugmart.com	https://www.internationaldrugmart.com/	2021	Cyprus	18664197475	USA - North America	No	Generic	GSL, P and POM	10 (Paracetamol, Metformin, Rosuvastatin, Ezetimibe, Formoterol, Ivermectin, Fluoxetine, Aspirin, Diclofenac, Azithromycin)	No	No	No	Detailed	Not Available	3 (Visa, Credit Card, Gift Cards)	7-21 days	Free - $12.99	No refund (Unless faulty, damaged or incorrect)	Easy to use	Average	Displayed	Illegitimate	Unapproved
52	iQ Doctor	https://www.iqdoctor.co.uk/	2021	UK	0121 753 4928	UK - Europe	Yes	Both	POM	None	No	Yes	Yes	Incomplete	Not Available	3 (Visa, Mastercard, American Express)	1-3 days	Free - 10.99	No refund (Unless faulty, damaged or incorrect)	Easy to use	Excellent	Displayed	Legitimate - GPhC	N/A
53	Israel Pharm	https://www.israelpharm.com/	2020	Isreal	18664421716	USA - North America	No	Both	P and POM	12 (Paracetamol, Dapagliflozin, Metformin, Rosuvastatin, Ezetimibe, Formoterol, Hydrochloroquine, Ivermectin, Fluoxetine, Aspirin, Diclofenac, Azithromycin)	Yes	Yes	Yes	Incomplete	Not Available	3 (Check, ACH, International Money Order)	1-10 days	Free - $20.00	No refund (Unless faulty, damaged or incorrect)	Average	Excellent	Displayed	Illegitimate	Unapproved
54	Lemon Aid	https://www.lemonaidhealth.com/	2021	USA	415-926-5818	USA - North America	Yes	Both	GSL, P and POM	N/A	Yes	Yes	Yes	Incomplete	N/A	4 (Visa, Mastercard, American Express, Maestro)	N/A	Free	N/A	Average	Excellent	Displayed	Illegitimate	LegitScript - Approved
55	Lloyds Pharmacy	https://lloydspharmacy.com/	N/A	UK	0345 600 3565	Australia - Oceania	No	Both	POM	3 (Paracetamol, Aspirin, Diclofenac)	No	Yes	Yes	Detailed	Not Available	3 (Visa, MasterCard, PayPal)	1-8 days	Free - £5.99	No refund (Unless faulty, damaged or incorrect)	Easy to use	Excellent	Displayed	Legitimate - GPhC	N/A
56	Maple	https://www.getmaple.ca/	2021	Canada	N/A	USA - North America	No	N/A	GSL, P and POM	13 (Paracetamol, Dapagliflozin, Metformin, Rosuvastatin, Ezetimibe, Formoterol, Hydroxychloroquine, Ivermectin, Chloroquine, Fluoxetine, Aspirin, Diclofenac, Azithromycin)	Yes	Yes	Yes	Detailed	N/A	6 (Visa, Mastercard, Maestro, Amex, Google Pay, Apple Pay)	N/A	Free	N/A	Easy to use	Excellent	Displayed	Illegitimate	Unapproved
57	MedExpress	https://www.medexpress.co.uk/	2021	UK	0208 123 0508	USA - North America	No	Generic	GSL, P and POM	2 (Paracetamol, Azithromycin)	No	Yes	Yes	Detailed	Detailed	5 (Visa, Mastercard, American Express, Apple Pay, PayPal)	Same day - 6 days	£2.90 - £19.95	No refund (Unless faulty, damaged or incorrect)	Easy to use	Excellent	Displayed	Legitimate - GPhC	N/A
58	Medical Specialists	https://www.medical-specialists.co.uk/index.php	2019	UK	+44 (0) 161 762 9108	USA - North America	No	Both	P and POM	4 (Metformin, Rosuvastatin, Diclofenac, Azithromycin)	No	Yes	Yes	Detailed	Detailed	4 (Visa, Mastercard, Maestro, Sage Pay)	1-7 days	Free - £10.00	No refund (Unless faulty, damaged or incorrect)	Easy to use	Average	Displayed	Legitimate - GPhC	N/A
59	Medino	https://www.medino.com/	2021	UK	020 381 858 41	Ireland - Europe	No	Both	GSL, P and POM	3 (Paracetamol, Aspirin, Diclofenac)	No	Yes	Yes	Detailed	Not Available	6 (Visa, Mastercard, Amex, Apple Pay, Google Pay, PayPal)	1-3 days	Free - £5.00	No refund (Unless faulty, damaged or incorrect)	Easy to use	Excellent	Displayed	Legitimate - GPhC	N/A
60	MedPlus Mart	https://www.medplusmart.com/	2021	India	040 67006700	UK - Europe	No	Both	GSL, P and POM	15 (Paracetamol, Dapagliflozin, Metformin, Rosuvastatin, Ezetimibe, Formoterol, Hydroxychloroquine, Ivermectin, Chloroquine, Fluoxetine, Alprazolam, Aspirin, Diclofenac, Azithromycin, Diazepam)	Yes	No	No	Incomplete	Not Available	7 (Visa, Mastercard, Maestro, PhonePe, Paytm.....)	N/A	N/A	No refund (Unless faulty, damaged or incorrect)	Easy to use	Excellent	Not Available	Illegitimate	Unapproved
61	Mr Med.in	https://www.mrmed.in/	2021	India	+91 89391 69999	India - Asia	Yes	Both	POM	6 (Paracetamol, Dapagliflozin, Metformin, Hydroxychloroquine, Ivermectin, Diclofenac)	Yes	No	No	Detailed	Not Available	7 (Visa, Mastercard, American Express, Google Pay, Paytm.....)	1-3 days	Free - ₹50.00	No refund (Unless faulty, damaged or incorrect)	Average	Excellent	Displayed	Illegitimate	Unapproved
62	My Big Pharmacy	https://mybigpharmacy.com/	2020	Nigeria	+234 902 618 0578	USA - North America	No	Both	GSL, P and POM	10 (Paracetamol, Metformin, Rosuvastatin, Hydroxychloroquine, Chloroquine, Fluoxetine, Aspirin, Diclofenac, Azithromycin, Diazepam)	No	No	No	Not Available	Not Available	4 (Visa, Mastercard, Verve, Klarna)	Same day - 10 days	Free - ₦1,500.00	Refund guaranteed	Average	Poor	Displayed	Illegitimate	Unapproved
63	My Chemist Plus	https://mychemistplus.co.uk/	2021	UK	01204 465052	USA - North America	No	Both	GSL, P and POM	2 (Paracetamol, Diclofenac)	No	Yes	Yes	Detailed	Not Available	4 (Visa, Mastercard, American Express, Maestro)	1-3 days	£5.95 - £7.95	No refund (Unless faulty, damaged or incorrect)	Easy to use	Excellent	Displayed	Legitimate - GPhC	N/A
64	My Pharm World	https://mypharmworld.com/	2021	UK	UK: +448000465357; +442038680652	USA - North America	No	Both	P and POM	12 (Paracetamol, Metformin, Rosuvastatin, Hydrochloroquine, Ivermectin, Chloroquine, Fluoxetine, Alprazolam, Aspirin, Diclofenac, Azithromycin, Diazepam)	No	No	No	Detailed	Not Available	12 (Visa, Mastercard, Paypal, Bitcoin, Sofort, SEPA ....)	5-15 days	Free - $15	Refund guaranteed	Average	Average	Not Available	Illegitimate	Unapproved
65	MyPharmacy	https://www.mypharmacy.co.uk/	2021	UK	01254 882 800	USA - North America	No	Both	GSL, P and POM	5 (Paracetamol, Formoterol, Chloroquine, Aspirin, Azithromycin)	No	Yes	Yes	Detailed	Detailed	3 (Visa, Mastercard, American Express)	1-4 days	Free - £12.99	No refund (Unless faulty, damaged or incorrect)	Easy to use	Excellent	Displayed	Legitimate - GPhC	N/A
66	No RX 247	https://norx247.com/	2021	Switzerland	+ 131 294 07051	USA - North America	No	Both	P and POM	12 (Paracetamol, Metformin, Rosuvastatin, Ezetimibe, Formoterol, Hydroxychloroquine, Ivermectin, Chloroquine, Fluoxetine, Aspirin, Diclofenac, Azithromycin)	No	No	No	Detailed	Not Available	4 (Visa, Mastercard, Western Union, MoneyGram)	10-23 days	Free - $25	Refund guaranteed	Average	Average	Not Available	Illegitimate	Unapproved
67	No.1 Canadian Pharmacy	http://norx24h.com/	2019	N/A	US: +1-760-284-3222; EU: +4420-3286-3820	Lithuania - Europe	N/A	Both	P and POM	12 (Paracetamol, Dapagliflozin, Metformin, Rosuvastatin, Ezetimibe, Ivermectin, Chloroquine, Fluoxetine, Aspirin, Diclofenac, Azithromycin, Diazepam)	No	No	No	Detailed	Not Available	2 (Visa, Mastercard)	3 days - 3 weeks	Free - $20.00	No refund (Unless faulty, damaged or incorrect)	Average	Average	Displayed	Illegitimate	Unapproved
68	Northwest Pharmacy	https://www.northwestpharmacy.com/	2021	Canada	1-866-539-5330	USA - North America	No	Both	P, POM and Veternairy	13 (Paracetamol, Dapagliflozin, Metformin, Rosuvastatin, Ezetimibe, Formoterol, Hydroxychloroquine, Ivermectin, Chloroquine, Fluoxetine, Aspirin, Diclofenac, Azithromycin)	Yes	No	No	Incomplete	Not Available	1 (Check)	11 days - 5 weeks	9.99	Refund guaranteed	Easy to use	Excellent	Displayed	Illegitimate	Unapproved
69	Norx pharma	https://norxpharma.org/	2021	Columbia	+1 202 7807 653	USA - North America	No	Both	POM	2 (Alprazolam, Diazepam)	No	No	No	Incomplete	Not Available	8 (Bitcoin, Western Union, CashApp, Zelle, Paypal, Money Gram... )	Next day - 7 days	Free	No refund (Unless faulty, damaged or incorrect)	Easy to use	Average	Displayed	Illegitimate	Unapproved
70	Online Pharmacy	http://norxcart.com/	2010	N/A	US: +1-760-284-3222; EU: +4420-3286-3820	USA - North America	N/A	Both	P and POM	13 (Paracetamol, Dapagliflozin, Metformin, Rosuvastatin, Ezetimibe, Hydroxychloroquine, Ivermectin, Chloroquine, Fluoxetine, Aspirin, Diclofenac, Azithromycin, Diazepam)	No	No	No	Detailed	Not Available	2 (Visa, Mastercard)	3 days - 3 weeks	Free - $20.00	No refund (Unless faulty, damaged or incorrect)	Average	Average	Displayed	Illegitimate	Unapproved
71	Online Pharmacy	http://rx-store-24x7.com/	2021	Czech Republic	US: +18007155341, EU: +442033185981	USA - North America	No	Both	POM	10 (Metformin, Rosuvastatin, Ezetimibe, Hydrochloroquine, Ivermectin, Chloroquine, Fluoxetine, Aspirin, Diclofenac, Azithromycin)	No	No	No	Detailed	Not Available	4 (Visa, Mastercard, Amex, Bitcoin)	5 days - 3 weeks	Free - £22.30	Refund guaranteed	Easy to use	Average	Displayed	Illegitimate	Unapproved
72	Onlinepharmacytab24.com	https://onlinepharmacytab24.com/	2021	N/A	+1 (888) 724-0478	USA - North America	N/A	Generic	P and POM	7 (Metformin, Chloroquine, Fluoxetine, Alprazolam, Aspirin, Azithromycin, Diazepam)	No	No	No	Detailed	Not Available	3 (Visa, Mastercard, Bitcoin)	3-60 days	£22.50 - £26.25	Refund guaranteed	Average	Average	Displayed	Illegitimate	Unapproved
73	Oxford Online Pharmacy	https://www.oxfordonlinepharmacy.co.uk/	2021	UK	01295 262925	UK - Europe	Yes	Both	P and POM	5 (Paracetamol, Rosuvastatin, Ezetimibe, Ivermectin, Diclofenac)	No	Yes	Yes	Incomplete	Detailed	5 (Visa, PayPal, Mastercard, Maestro, American Express)	1-3 days	Free - £10.99	No refund (Unless faulty, damaged or incorrect)	Easy to use	Excellent	Displayed	Legitimate - GPhC	N/A
74	ParaFarmacia-online.com	https://www.parafarmacia-online.com/	2021	Spain	+34 658 525 198	USA - North America	No	Branded	GSL and P	3 (Paracetamol, Aspirin, Diclofenac)	N/A	No	No	Not Available	Not Available	4 (Visa, Maestro, PayPal, Discover)	3-45 days	4,99€ - 17,99€	No refund (Unless faulty, damaged or incorrect)	Easy to use	Average	Not Available	Illegitimate	Generalitat Valenciana - Approved
75	Peak Pharmacy Online	https://www.peakpharmacyonline.co.uk/	2020	UK	01159 512092	UK - Europe	Yes	Both	GSL, P and POM	3 (Paracetamol, Aspirin, Diclofenac)	No	Yes	Yes	Detailed	Not Available	3 (Visa, Mastercard, Maestro)	1-3 days	Free - £7.39	No refund (Unless faulty, damaged or incorrect)	Easy to use	Average	Displayed	Legitimate - GPhC	N/A
76	Pharma Online	https://shop.wdevcompany.com/	2021	N/A	UK: +1(646)2052937, US: +1(866)4175821	USA - North America	N/A	Both	POM	13 (Paracetamol, Dapagliflozin, Metformin, Rosuvastatin, Ezetimibe, Formoterol, Hydroxychloroquine, Ivermectin, Chloroquine, Fluoxetine, Aspirin, Diclofenac, Azithromycin)	No	No	No	Detailed	Not Available	4 (Visa, Mastercard, American Express, Bitcoin)	5-21 days	£7.40	No refund (Unless faulty, damaged or incorrect)	Difficult to navigate	Poor	Displayed	Illegitimate	Unapproved
77	Pharmacy Direct	https://www.pharmacydirect.com.au/	2021	Australia	1300 934 785	Australia - Oceania	Yes	Both	GSL, P and POM	15 (Paracetamol, Dapagliflozin, Metformin, Rosuvastatin, Ezetimibe, Formoterol, Hydroxychloroquine, Ivermectin, Chloroquine, Fluoxetine, Alprazolam, Aspirin, Diclofenac, Azithromycin, Diazepam)	Yes	No	No	Not Available	Not Available	7 (Mastercard, American Express, PayPal, Zip, Pay....)	1-12 days	Free - $21.99+	No refund (Unless faulty, damaged or incorrect)	Easy to use	Average	Displayed	Illegitimate	Unapproved
78	Pharmacy Direct GB	https://pharmacydirectgb.co.uk/	2021	UK	0121 772 3873	UK - Europe	Yes	Both	GSL, P and POM	2 (Chloroquine, Diclofenac)	Yes	Yes	Yes	Detailed	Detailed	4 (Visa, Mastercard, Maestro, Delta)	1-2 days	Free - £5.90	No refund (Unless faulty, damaged or incorrect)	Easy to use	Excellent	Not Available	Legitimate - GPhC	N/A
79	Pharmacy Hall	http://cheap-pharma.com/	2021	N/A	+1-718-487-9792, +4420-3239-7092	Russia - Europe	N/A	Both	P and POM	12 (Dapagliflozin, Metformin, Rosuvastatin, Ezetimibe, Formoterol, Hydroxychloroquine, Ivermectin, Chloroquine, Fluoxetine, Aspirin, Diclofenac, Azithromycin)	No	No	No	Detailed	Not Available	1 (Mastercard)	3 days - 3 weeks	Free - $29.95	No refund (Unless faulty, damaged or incorrect)	Average	Average	Displayed	Illegitimate	Unapproved
80	Pharmacy Online	https://www.pharmacyonline.co.uk/	2021	UK	0141 952 5918	USA - North America	No	Both	GSL, P and POM	4 (Paracetamol, Aspirin, Diclofenac, Azithromycin)	No	Yes	Yes	Detailed	Detailed	2 (Visa, Mastercard)	1-7 days	Free - £9.99	No refund (Unless faulty, damaged or incorrect)	Easy to use	Excellent	Displayed	Legitimate - GPhC	N/A
81	Pharmacy Planet	https://www.pharmacyplanet.com/	2020	UK	0800 978 8956	UK - Europe	Yes	Both	GSL, P and POM	7 (Dapagliflozin, Metformin, Rosuvastatin, Ezetimibe, Formoterol, Diclofenac, Azithromycin)	No	Yes	Yes	Detailed	Not Available	3 (Visa, Mastercard, Sage Pay)	N/A	£2.99 - £10	No refund (Unless faulty, damaged or incorrect)	Easy to use	Excellent	Displayed	Legitimate - GPhC	N/A
82	Pharmearth	https://www.pharmearth.com/	2021	India	+91 95123 41233	USA - North America	No	Both	GSL, P and POM	1 (Diclofenac)	Yes	No	No	Not Available	Not Available	7 (Visa, Mastercard, Maestro, PhonePe, Paytm.....)	1-4 days	Free - Undefined amount	Refund guaranteed	Difficult to navigate	Average	Not Available	Illegitimate	Unapproved
83	Pharmica	https://pharmica.uk/	2021	UK	0207 112 9014	UK - Europe	Yes	Both	GSL, P and POM	2 (Paracetamol, Diclofenac)	No	Yes	Yes	Detailed	Detailed	6 (Visa, Mastercard, Amex, Apple Pay, Google Pay, PayPal)	Same day - 3 days	Free - £19.95	No refund (Unless faulty, damaged or incorrect)	Easy to use	Excellent	Displayed	Legitimate - GPhC	N/A
84	Pill Buys	https://pillbuys.com/	2019	Russia	N/A	USA - North America	No	Both	GSL, P and POM	12 (Paracetamol, Dapagliflozin, Metformin, Rosuvastatin, Ezetimibe, Formoterol, Ivermectin, Chloroquine, Fluoxetine, Aspirin, Diclofenac, Azithromycin)	No	No	No	Detailed	Not Available	5 (Visa, Maestro, Discover, Mastercard, PayPal)	1 week - 2 months	$10 - $30	Refund guaranteed	Difficult to navigate	Average	Displayed	Illegitimate	Unapproved
85	Pill Doctor	https://www.pilldoctor.co.uk/	N/A	UK	0161 850 8980	USA - North America	No	Both	P and POM	1 (Diclofenac)	No	Yes	Yes	Detailed	Not Available	4 (Visa, Mastercard, American Express, Maestro)	1-3 days	Free - £7.99	No refund (Unless faulty, damaged or incorrect)	Easy to use	Excellent	Displayed	Illegitimate	Unapproved
86	Pillsonlineservices.com	https://pillsonlineservices.com/	2021	N/A	+1 (888) 724-0478	USA - North America	N/A	Generic	P and POM	7 (Metformin, Chloroquine, Fluoxetine, Alprazolam, Aspirin, Azithromycin, Diazepam)	No	No	No	Detailed	Not Available	3 (Visa, Mastercard, Bitcoin)	3-60 days	£22.50 - £26.25	Refund guaranteed	Average	Average	Displayed	Illegitimate	Unapproved
87	Pillsspace.com	https://pillsspace.com/	2021	N/A	+1 (888) 724-0478	USA - North America	N/A	Generic	P and POM	7 (Metformin, Chloroquine, Fluoxetine, Alprazolam, Aspirin, Azithromycin, Diazepam)	No	No	No	Detailed	Not Available	3 (Visa, Mastercard, Bitcoin)	3-60 days	£22.50 - £26.25	Refund guaranteed	Average	Average	Displayed	Illegitimate	Unapproved
88	PlushCare	https://plushcare.com/	2021	N/A	(888) 820-7736	USA - North America	N/A	N/A	GSL, P and POM	13 (Paracetamol, Dapagliflozin, Metformin, Rosuvastatin, Ezetimibe, Formoterol, Hydroxychloroquine, Ivermectin, Chloroquine, Fluoxetine, Aspirin, Diclofenac, Azithromycin)	Yes	Yes	Yes	N/A	N/A	4 (Visa, Mastercard, American Express, Discover)	N/A	N/A	N/A	Average	Excellent	Displayed	Illegitimate	LegitScript - Approved
89	PostMyMeds	https://www.postmymeds.co.uk/	2021	UK	020 8894 6080	USA - North America	No	Both	GSL, P and POM	2 (Diclofenac, Azithromycin)	No	Yes	Yes	Detailed	Detailed	4 (Visa, Mastercard, American Express, Sage Pay)	1-3 days	Free - £5.95	No refund (Unless faulty, damaged or incorrect)	Easy to use	Excellent	Displayed	Legitimate - GPhC	N/A
90	Prescription Doctor	https://www.prescriptiondoctor.com/	2021	UK	0208 1917477	France - Europe	No	Both	GSL, P and POM	8 (Paracetamol, Metformin, Rosuvastatin, Ezetimibe, Formoterol, Ivermectin, Diclofenac, Azithromycin)	No	Yes	Yes	Detailed	Detailed	4 (Visa, Mastercard, American Express, Maestro)	1- 3 days	£3.99 - £13.99	No refund (Unless faulty, damaged or incorrect)	Easy to use	Excellent	Displayed	Legitimate - GPhC	N/A
91	Push Health	https://www.pushhealth.com/	2021	USA	(855) 787-4432	USA - North America	Yes	N/A	P and POM	7 (Metformin, Formoterol, Hydroxychloroquine, Ivermectin, Chloroquine, Diclofenac, Azithromycin)	No	Yes	Yes	Incomplete	Not Available	6 (Visa, Mastercard, American Express, JCB, Discover, PayPal)	N/A	N/A	No refund (Unless faulty, damaged or incorrect)	Easy to use	Average	Not Available	Illegitimate	LegitScript - Approved
92	QuickMD	https://quick.md/	N/A	USA	888-8-QUICKMD (888-878-4256)	USA - North America	Yes	N/A	GSL, P and POM	13 (Paracetamol, Dapagliflozin, Metformin, Rosuvastatin, Ezetimibe, Formoterol, Hydroxychloroquine, Ivermectin, Chloroquine, Fluoxetine, Aspirin, Diclofenac, Azithromycin)	Yes	Yes	Yes	N/A	N/A	N/A	N/A	N/A	N/A	Average	Excellent	Displayed	Illegitimate	LegitScript - Approved
93	QuickMeds	https://www.quickmeds.co.uk/	2021	UK	0121 628 5318	USA - North America	No	Both	GSL, P and POM	None	No	Yes	Yes	Detailed	Detailed	4 (Visa, Mastercard, PayPal, Sage Pay)	1-3 days	£3.45-£9.99	No refund (Unless faulty, damaged or incorrect)	Easy to use	Excellent	Displayed	Legitimate - GPhC	N/A
94	Right Dose	https://www.rightdose.co.uk/	2021	UK	0141 418 0640	USA - North America	No	Both	GSL and P	2 (Paracetamol, Aspirin)	N/A	Yes	Yes	Detailed	Detailed	2 (Visa, Mastercard)	1-5 days	Free - £6.49	No refund (Unless faulty, damaged or incorrect)	Easy to use	Excellent	Displayed	Legitimate - GPhC	N/A
95	RXLive	https://rxlive.co.uk/	2021	UK	0800 280 0808	Ireland - Europe	No	Both	GSL, P and POM	N/A	Yes	Yes	Yes	Detailed	Detailed	4 (Visa, Mastercard, American Express, Maestro)	Same day - 3 days	Free	N/A	Average	Excellent	Displayed	Legitimate - GPhC	N/A
96	Selleckchem.com	https://www.selleckchem.com/	2021	USA	US - (832)582-8158, UK - 02074594182	USA - North America	Yes	Generic	GSL, P, POM and Veternairy	13 (Paracetamol, Dapagliflozin, Metformin, Rosuvastatin, Ezetimibe, Formoterol, Hydroxychloroquine, Ivermectin, Chloroquine, Fluoxetine, Aspirin, Diclofenac, Azithromycin)	No	No	No	Not Available	Not Available	4 (Visa, Mastercard, American Express, Discover)	2-3 days	Free - $40	Refund guaranteed	Easy to use	Average	Not Available	Illegitimate	Unapproved
97	Simple Online Pharmacy	https://www.simpleonlinepharmacy.co.uk/	2021	UK	0141 774 5023	USA - North America	No	Both	GSL, P and POM	8 (Paracetamol, Metformin, Rosuvastatin, Formoterol, Chloroquine, Aspirin, Diclofenac, Azithromycin)	No	Yes	Yes	Detailed	Detailed	2 (Visa, Mastercard)	1-5 days	Free - £6.49	No refund (Unless faulty, damaged or incorrect)	Easy to use	Excellent	Displayed	Legitimate - GPhC	N/A
98	Simply Meds Online	https://www.simplymedsonline.co.uk/	2021	UK	0208 262 3252	UK - Europe	Yes	Both	GSL, P and POM	4 (Paracetamol, Aspirin, Diclofenac, Azithromycin)	No	Yes	Yes	Incomplete	Not Available	5 (Visa, Mastercard, American Express, Apple Pay, Google Pay)	Same day - 3 days	Free - £12.50	No refund (Unless faulty, damaged or incorrect)	Easy to use	Excellent	Displayed	Legitimate - GPhC	N/A
99	Super Pharmacy	https://www.superpharmacy.com.au/	2021	Australia	1300 463 342	Australia - Oceania	Yes	Both	GSL, P and POM	13 (Paracetamol, Dapagliflozin, Metformin, Rosuvastatin, Ezetimibe, Formoterol, Hydroxychloroquine, Ivermectin, Fluoxetine, Aspirin, Diclofenac, Azithromycin, Diazepam)	Yes	Yes	Yes	Detailed	Not Available	6 (PayPal, Google Pay, Apple Pay, Stripe, Pay, Zip)	1-8 days	Free - $10.95	No refund (Unless faulty, damaged or incorrect)	Easy to use	Excellent	Not Available	Illegitimate	LegitScript - Approved
100	Superdrug	https://onlinedoctor.superdrug.com/	2021	UK	0203 5880 293	USA - North America	No	Both	P and POM	5 (Metformin, Rosuvastatin, Formoterol, Chloroquine, Azithromycin)	No	Yes	Yes	Detailed	Detailed	2 (Visa, Mastercard)	1-6 days	Free - £3.99	Refund guaranteed	Easy to use	Excellent	Displayed	Legitimate - GPhC	N/A
101	The Independent Pharmacy	https://www.theindependentpharmacy.co.uk/	2021	UK	3332200519	Germany - Europe	No	Both	GSL, P and POM	5 (Paracetamol, Ivermectin, Aspirin, Diclofenac, Azithromycin)	No	Yes	Yes	Detailed	Detailed	5 (Visa, Mastercard, Maestro, Cirrus, Amex)	1-3 days	Free - £10.45	No refund (Unless faulty, damaged or incorrect)	Easy to use	Excellent	Displayed	Legitimate - GPhC	N/A
102	The Online Clinic	https://www.theonlineclinic.co.uk/	2021	UK	020 7127 9200	USA - North America	No	Both	GSL, P and POM	7 (Paracetamol, Rosuvastatin, Formoterol, Ivermectin, Chloroquine, Diclofenac, Azithromycin)	No	Yes	Yes	Detailed	Detailed	3 (Visa, Mastercard, American Express)	1-2 days (offer same day collection as well)	Free - £29.95	No refund (Unless faulty, damaged or incorrect)	Easy to use	Excellent	Displayed	Legitimate - GPhC	N/A
103	TheSocialMedwork	https://thesocialmedwork.com/	2021	Netherlands	+31 20 8084 414	USA - North America	No	Both	POM	5 (Rosuvastatin, Ezetimibe, Formoterol, Hydroxychloroquine, Azithromycin)	Yes	No	No	Incomplete	Not Available	2 (Credit card, Bank Transfer)	1-2 weeks	N/A	No refund (Unless faulty, damaged or incorrect)	Easy to use	Excellent	Displayed	Illegitimate	Dutch Ministry of Health, Welfare and Sport - Approved
104	Tramadol 50MGHigh	https://tramadol50mghigh.com/	2019	USA	N/A	USA - North America	Yes	Both	POM	3 (Fluoxetine, Alprazolam, Diazepam)	No	No	No	Detailed	Not Available	5 (Visa, Mastercard, American Express, Discover, Maestro)	Next day - 10 days	$40 - $120	No refund (Unless faulty, damaged or incorrect)	Average	Average	Not Available	Illegitimate	Unapproved
105	Treated	https://www.treated.com/	2021	UK	0207 043 0716	Netherlands - Europe	No	Both	P and POM	5 (Metformin, Rosuvastatin, Ezetimibe, Diclofenac, Azithromycin)	No	Yes	Yes	Detailed	Detailed	3 (Visa, Mastercard, Maestro)	1-3 days	Free	No refund (Unless faulty, damaged or incorrect)	Easy to use	Excellent	Displayed	Legitimate - GPhC	N/A
106	Trust Pharmacy	http://cheapdrugs365.com/	2021	N/A	US: +17184879792, UK: +442032397092	Lithuania - Europe	N/A	Both	POM	12 (Dapagliflozin, Metformin, Rosuvastatin, Ezetimibe, Formoterol, Hydroxychloroquine, Ivermectin, Chloroquine, Fluoxetine, Aspirin, Diclofenac, Azithromycin)	No	No	No	Detailed	Not Available	7 (Visa, Mastercard, American Express, PayPal, Bitcoin .....)	3 days - 3 weeks	Free - $29.95	No refund (Unless faulty, damaged or incorrect)	Easy to use	Average	Displayed	Illegitimate	Unapproved
107	Trusted Pharmacy	https://orderrxstore.com/	N/A	N/A	+180005324808, +17184759088, +442030110241	Switzerland - Europe	N/A	Both	POM	13 (Paracetamol, Dapagliflozin, Metformin, Rosuvastatin, Ezetimibe, Formoterol, Hydroxychloroquine, Ivermectin, Chloroquine, Fluoxetine, Aspirin, Diclofenac, Azithromycin)	No	No	No	Detailed	Not Available	2 (Bank Card, Bitcoin)	7-23 days	Free - $30	No refund (Unless faulty, damaged or incorrect)	Average	Average	Displayed	Illegitimate	Unapproved
108	Trusted Tabs	https://trustedrxsolutions.com/	N/A	N/A	UK - +44(203)0110241, US - +1(718)4759088	Switzerland - Europe	N/A	Both	POM	13 (Paracetamol, Dapagliflozin, Metformin, Rosuvastatin, Ezetimibe, Formoterol, Hydroxychloroquine, Ivermectin, Chloroquine, Fluoxetine, Aspirin, Diclofenac, Azithromycin)	No	No	No	Detailed	Not Available	2 (Bank Card, Bitcoin)	7-23 days	Free - $30	No refund (Unless faulty, damaged or incorrect)	Average	Average	Displayed	Illegitimate	Unapproved
109	UK Meds	https://www.ukmeds.co.uk/	2021	UK	0115 907 0050	USA - North America	No	Both	GSL, P and POM	4 (Metformin,Ezetimibe, Diclofenac, Azithromycin)	No	Yes	Yes	Detailed	Not Available	6 (Visa, Mastercard, American Express, Apple Pay, Google Pay, PayPal)	20mins - 5 days	£2.95 - £12.95 (Deliveroo prices can vary)	No refund (Unless faulty, damaged or incorrect)	Easy to use	Excellent	Displayed	Illegitimate	Unapproved
110	UK Pharmacy Meds	https://www.ukpharmacymeds.com/	2021	UK	01204 393847	USA - North America	No	Both	POM and Veternairy	3 (Metformin, Diclofenac, Azithromycin)	No	Yes	Yes	Detailed	Detailed	5 (Visa, Maestro, Discover, Mastercard,American Express)	1-15 days	£4.99 - £16.99	No refund (Unless faulty, damaged or incorrect)	Easy to use	Excellent	Not Available	Legitimate - GPhC	N/A
111	US Pill Shop	https://uspillshop.com/	2021	USA	+1 315 825 4043	Cyprus - Europe	No	Both	POM	2 (Alprazolam, Diazepam)	No	No	No	Detailed	Not Available	1 (Check)	Next day - 7 days	Free	No refund (Unless faulty, damaged or incorrect)	Average	Average	Not Available	Illegitimate	Unapproved
112	US Web Medicals	https://uswebmedicals.com/	N/A	USA	+1 (786) 802-1504	Russia - Europe	No	Both	POM	2 (Alprazolam, Diazepam)	No	No	No	Detailed	Not Available	1 (Payment)	Next day - 7 days	Free - $30	N/A	Average	Average	Not Available	Illegitimate	Unapproved
113	Voltarol	https://www.voltarol.co.uk/	2021	UK	+44 (0) 20 8047 5000	USA - North America	No	Both	GSL	3 (Paracetamol, Aspirin, Diclofenac)	N/A	No	No	Detailed	Detailed	4 (Visa, Mastercard, Maestro, Amex)	1-3 days	Free - multiple different delivery costs	No refund (Unless faulty, damaged or incorrect)	Easy to use	Excellent	Displayed	Legitimate - MHRA	N/A
114	Well	https://www.well.co.uk/	2020	UK	01782 597 313	USA - North America	No	Both	GSL, P and POM	N/A	No	Yes	Yes	Detailed	Detailed	4 (Visa, Mastercard, American Express, Maestro)	1-5 days	Free	No refund (Unless faulty, damaged or incorrect)	Easy to use	Excellent	Displayed	Legitimate - GPhC	N/A
115	Your Coop Pharmacy	https://www.cooppharmacy.coop/	2021	UK	01902 357 660	UK - Europe	Yes	Both	GSL, P and POM	3 (Paracetamol, Aspirin, Azithromycin)	No	Yes	Yes	Detailed	Detailed	3 (Visa, Mastercard, Maestro)	1-5 days	£3.95 - £5.95	No refund (Unless faulty, damaged or incorrect)	Easy to use	Excellent	Displayed	Legitimate - GPhC	N/A
116	Zavamed	https://www.zavamed.com/uk/	2021	UK	020 3808 3239	USA - North America	No	Both	P and POM	4 (Rosuvastatin, Formoterol, Ivermectin, Azithromycin)	No	Yes	Yes	Detailed	Detailed	2 (Visa, Mastercard)	1-5 days	Free - £7.99	No refund (Unless faulty, damaged or incorrect)	Easy to use	Excellent	Displayed	Legitimate - GPhC	N/A
	N/A = Not Applicable
										M BN M BN N NNB NMMN MMMNMMMNNNMMMMMNNNNNMMMMMMMNMMMMMMMMMMMMMMMMMMMMMMMMMMMMMMMMMMMM MMMMM NB M M NB NB N N N N N NB N N NB N M N N BN N BN
	1
	2
	3
